# Supplementary material for: Characteristics of the Fungal Communities and Co-occurrence Networks in Hazelnut Tree Root Endospheres and Rhizosphere Soil
Source: Front Plant Sci. 2021 Dec 8;12:749871. doi: 10.3389/fpls.2021.749871 (PMC8692873; doi:10.3389/fpls.2021.749871)
Supplement: Supplementary Table 3 — Fungal network properties of in root endospheres and rhizosphere soil. [file Table_3.XLSX]

## Sheet: Sheet1
Table S2 Fungal network properties of endophytic and soil
Network metrics	T	G
Number of nodes	460	184
Number of edges	8091	1629
Average connectivity	35.18	17.71
Clustering coefficient	0.38	0.52
Positive interaction	5330	1436
Negative interaction	2761	193
Modularity	0.32	0.43
