# Supplementary material for: Characteristics of the Fungal Communities and Co-occurrence Networks in Hazelnut Tree Root Endospheres and Rhizosphere Soil
Source: Front Plant Sci. 2021 Dec 8;12:749871. doi: 10.3389/fpls.2021.749871 (PMC8692873; doi:10.3389/fpls.2021.749871)
Supplement: Supplementary Table 9 — Correlation results of correlation matrix between fungi in the root endospheres and soil properties. [file Table_9.XLSX]

## Sheet: 相关性矩阵
	pH	SWC	TOC	TN	TP	AP	AK
OTU936	0.11996	0.76185	-0.73432	0.73432	-0.16091	0.75267	-0.73432
OTU3421	-0.34714	-0.49509	0.06657	-0.24131	0.31467	-0.39524	0.77801
OTU1753	0.7823	0.62678	-0.22536	0.42255	0.21164	-0.29578	-0.55635
OTU979	0.22847	-0.44056	0.13986	-0.09091	0.43783	-0.32867	0.38462
OTU315	-0.58761	-0.70424	0.49297	-0.80284	-0.35274	-0.00704	0.52114
OTU3986	0.59218	0.71186	-0.4022	0.55525	0.25493	0.04271	-0.79728
OTU2383	-0.37833	-0.35798	0.56909	-0.72514	-0.70802	0.25701	0.06425
OTU304	-0.48906	-0.59663	0.11015	-0.22947	0.3632	-0.26619	0.75267
OTU1714	0.27465	-0.04904	0.08406	0.29072	0.41404	-0.69002	0.28021
OTU1770	0.85922	0.60837	-0.38443	0.68302	0.40193	-0.30232	-0.48894
OTU1715	0.74473	-0.02339	0.35091	0.03119	0.42964	-0.74861	0.08578
OTU330	0.0878	-0.3057	0.21836	-0.13101	0.48123	-0.13101	0.3057
OTU1767	0.51674	0.05507	0.50484	0.02754	0.22068	-0.5232	-0.15604
OTU3093	0.20623	0.58222	-0.676	0.64083	-0.20746	0.66037	-0.60566
OTU2393	0.28859	-0.32868	0.67399	-0.18306	-0.08336	-0.26627	0.04993
OTU3001	-0.5212	-0.23204	0.23929	-0.55834	-0.45762	0.37706	0.08701
OTU2153	-0.01243	-0.24383	0.28977	-0.44525	-0.32214	-0.08128	0
OTU678	-0.44753	-0.56909	0.1744	-0.25701	0.3632	-0.23865	0.72514
OTU477	-0.66411	-0.60837	0.60837	-0.92935	-0.45801	0.10077	0.43668
OTU3101	-0.50613	-0.32253	0.14947	-0.1652	-0.35462	0.2596	0.19667
OTU2765	0.59403	0.48252	-0.51748	0.44056	0.2662	-0.18881	-0.43357
OTU1234	0.11367	0.18715	0.14036	-0.18715	-0.07812	-0.02339	-0.3899
OTU1768	0.77121	0.15343	0.14613	0.32148	0.46476	-0.53336	-0.15343
OTU2290	0.20382	0.19495	0.03899	-0.09358	-0.17186	0.23394	-0.42889
OTU2397	-0.30533	0.00538	0.29028	-0.65044	-0.5008	0.13439	-0.13439
OTU1155	0.17575	-0.21678	0.0979	-0.09091	0.20666	-0.5035	0.41259
OTU334	-0.25669	-0.39242	0.2634	-0.25265	0.29617	-0.13439	0.51068
OTU985	-0.16872	0.33566	-0.3986	-0.11189	-0.51489	0.27273	-0.1958
OTU2078	0.54372	-0.2205	0.34116	0.05409	0.21672	-0.50342	0.10817
OTU2381	-0.26298	-0.12851	0.38552	-0.26619	-0.75399	0.39469	-0.02754
OTU2371	0.28429	0.3118	-0.10877	0.18853	-0.14528	0.10877	-0.42057
OTU3786	-0.24302	-0.28853	0.03119	0.05459	0.54291	-0.22614	0.3899
OTU1807	-0.30932	-0.58042	0.6014	-0.8042	-0.19965	-0.24476	0.48252
OTU967	-0.3346	-0.21634	0.34948	-0.50758	-0.61891	0.38276	-0.10817
OTU3398	-0.10229	-0.37193	0.68071	-0.65264	-0.45343	-0.29474	0.20702
OTU3881	0.66582	0.38684	-0.13286	0.25008	0.30923	-0.21101	-0.43373
OTU2343	-0.23457	-0.21404	0.14035	-0.34386	-0.37258	0.10176	0.05614
OTU887	-0.63833	-0.40247	0.42201	-0.76978	-0.2877	-0.0508	0.4142
OTU2342	-0.2353	-0.15604	0.38552	-0.67006	-0.21149	0.05507	0.03672
OTU515	-0.15602	-0.30292	0.38146	-0.52731	-0.4121	0.13837	0.01122
OTU573	-0.13708	-0.25175	0.44755	-0.56643	-0.58144	0.06993	0.03497
OTU3106	0.29682	0.47452	-0.04921	0.47452	0.17254	-0.04569	-0.39368
OTU3008	0.01692	0.26179	-0.3104	0.02618	-0.07493	0.39642	-0.47869
OTU877	-0.4885	0.19719	-0.06338	-0.28874	-0.66668	0.80284	-0.32395
OTU2336	-0.14764	-0.45895	0.01836	0.01836	0.33102	-0.38552	0.54156
OTU391	-0.45076	-0.13257	-0.28853	0.19495	0.24216	0.13257	0.30412
OTU306	-0.64307	-0.4623	-0.01613	-0.18277	0.05116	-0.20427	0.65044
OTU683	-0.32694	-0.38167	0.25265	-0.2634	0.22078	-0.12364	0.52143
OTU1773	0.45213	0.47621	-0.61731	0.73371	0.13075	0.23281	-0.45152
OTU3095	0.38897	0.59911	-0.61991	0.78217	0.0771	0.47429	-0.61159
OTU1146	0.11619	0.63969	-0.51068	0.51068	-0.24232	0.65044	-0.59131
OTU1481	-0.00786	-0.23445	0.79322	-0.58613	-0.14092	-0.19928	0.03126
OTU337	0.14821	0.39936	-0.7278	0.75766	0.31407	0.50386	-0.40682
OTU1723	0.52441	0.21101	-0.04689	0.32432	0.29749	-0.58222	0.03126
OTU1775	0.00716	-0.30966	0.85067	-0.67982	-0.22819	-0.37372	0.12813
OTU2938	-0.30533	0.00538	0.29028	-0.65044	-0.5008	0.13439	-0.13439
OTU298	-0.25669	-0.52143	0.043	-0.12364	0.4658	-0.2634	0.59131
OTU2385	0.22655	-0.2817	-0.07042	0.06338	0.47972	-0.23944	0.24648
OTU2346	-0.21223	0.15604	0.07343	-0.33962	-0.39998	0.27537	-0.32126
OTU303	-0.62054	-0.50467	0.29613	-0.66316	-0.42826	0.05005	0.34618
OTU3111	0.27395	0.81545	-0.61575	0.80297	0.04376	0.50758	-0.81545
OTU3007	-0.24963	-0.32357	0.72991	-0.71862	-0.49374	-0.08277	0.0903
OTU476	-0.17813	0.40702	-0.7579	0.27369	-0.20035	0.38246	-0.35439
OTU1755	0.43737	0.41331	-0.38431	0.52208	-0.13801	0.19578	-0.39156
OTU1203	0.27768	-0.06294	-0.27273	0.32867	0.48336	-0.44056	0.32168
OTU1751	0.49826	0.32805	-0.29239	0.48851	-0.00893	0.03922	-0.33161
OTU1330	-0.01062	-0.03521	0.28874	-0.33804	-0.31394	0.13381	-0.26761
OTU3422	-0.14159	-0.34944	0.18542	-0.21394	0.22861	-0.13906	0.34944
OTU1031	0.25355	-0.00353	-0.04586	0.22576	0.26149	-0.55381	0.2434
OTU4133	-0.48292	-0.21836	0.13101	-0.21836	-0.13124	-0.04367	0.39304
OTU2464	-0.06243	-0.07306	-0.29225	0.31417	0.59651	-0.15343	0.18266
OTU2370	0.24453	-0.15604	0.31208	-0.12851	-0.10115	-0.33962	0.12851
OTU983	0.12698	-0.44913	0.17895	-0.17193	0.20562	-0.3193	0.4
OTU3336	0.31829	0.37848	-0.76061	0.72786	0.28618	0.20744	-0.29114
OTU3103	0.0878	0.3057	-0.48038	0.48038	0.17499	0.3057	-0.39304
OTU3115	0.24824	-0.30823	0.02452	-0.01751	0.4	-0.24518	0.24869
OTU1805	0.11534	-0.42223	0.25701	-0.07343	0.53331	-0.31208	0.45895
OTU2907	0.16939	0.07905	0.21634	-0.26627	-0.23339	0.11649	-0.27875
OTU1800	-0.37833	-0.35798	0.56909	-0.72514	-0.70802	0.25701	0.06425
OTU2526	0.04938	0.04561	0.1614	0.04211	-0.21793	0.03509	-0.02105
OTU3107	0.15687	0.72514	-0.75267	0.75267	-0.05977	0.73432	-0.75267
OTU548	-0.55826	-0.56909	0.12851	-0.25701	0.26666	-0.23865	0.75267
OTU1785	-0.0583	0.20035	-0.15466	-0.20387	-0.08275	0.14411	-0.20035
OTU2894	-0.18281	-0.1462	0.36371	-0.44928	-0.58581	0.12837	0.06775
OTU1033	0.24913	0.0107	0.27456	-0.19255	0.02143	-0.35301	-0.02496
OTU1344	-0.18224	-0.20303	0.35531	-0.42057	-0.48305	0.10152	-0.02175
OTU1661	0.55208	0.25795	-0.12481	0.30787	0.51889	-0.47429	-0.11649
OTU3108	0.21886	0.51068	-0.59131	0.59131	0.11039	0.56981	-0.63969
OTU977	0.11534	-0.09179	0.25701	-0.3488	-0.10115	-0.11933	-0.07343
OTU285	0.05115	-0.08772	-0.20351	0.11228	0.15642	-0.29123	0.21755
OTU3100	0.0878	0.3057	-0.48038	0.48038	0.17499	0.3057	-0.39304
OTU1437	-0.2391	0.42109	-0.68622	0.57705	-0.04687	0.59265	-0.33531
OTU973	-0.0878	-0.04367	0.48038	-0.39304	-0.48123	0.04367	-0.04367
OTU2333	-0.28367	-0.08654	0.02634	-0.26337	-0.40894	0.19565	-0.01505
OTU1473	0.16509	0.10451	0.0112	-0.29112	-0.40006	0.2426	-0.26126
OTU2358	-0.3628	-0.37398	0.53479	-0.74796	-0.59192	-0.05984	0.3104
OTU3491	-0.00461	-0.07343	0.3488	-0.47731	-0.28505	-0.04589	-0.09179
OTU3666	0.17532	0.27537	0.00918	0.27537	0.23907	-0.04589	-0.14686
OTU362	-0.01324	-0.34614	0.38001	-0.22198	0.16584	-0.15426	0.38001
OTU2828	-0.21886	-0.36016	0.65044	-0.52143	-0.65158	0.18277	0.11289
OTU1112	-0.47035	-0.60824	0.42889	-0.29632	0.17576	-0.3743	0.67063
OTU3798	0.06215	-0.23652	0.52143	-0.15589	-0.1077	-0.15052	0.02688
OTU2730	0.25669	-0.09221	0.12767	0.04256	0.72475	-0.63836	0.21279
OTU4055	0.10612	0.75267	-0.75267	0.75267	-0.13793	0.73432	-0.72514
OTU3027	0.02516	-0.3003	0.45045	-0.47547	-0.28829	-0.02502	0.02502
OTU2288	-0.48292	-0.21836	0.13101	-0.21836	-0.13124	-0.04367	0.39304
OTU2375	0.06215	-0.29566	0.16664	-0.21502	-0.2854	-0.09138	0.2634
OTU1659	-0.0766	-0.04298	-0.03517	-0.06643	-0.28183	-0.00782	0.12895
OTU1064	0.76127	0.11015	0.11015	0.26619	0.50573	-0.73432	-0.03672
OTU970	0.22512	0.22394	0.10451	0.17915	-0.1103	0.44788	-0.51506
OTU1470	-0.0233	0.15333	0.23534	-0.22108	-0.08394	-0.09628	-0.30309
OTU883	0.21331	0.3994	-0.19138	0.47429	0.31467	0.07905	-0.31203
OTU2324	-0.37371	-0.25701	0.53238	-0.75267	-0.69882	0.22947	0
OTU2289	0.25204	-0.01508	0.06032	-0.21489	-0.12274	-0.23751	0.02262
OTU806	-0.54903	-0.58745	0.10097	-0.23865	0.29884	-0.25701	0.76185
OTU333	-0.19725	-0.51068	0.08601	-0.13439	0.5035	-0.25265	0.56981
OTU255	-0.30533	0.00538	0.29028	-0.65044	-0.5008	0.13439	-0.13439
OTU494	-0.22794	-0.63239	0.16226	-0.14146	0.55223	-0.38276	0.74056
OTU902	-0.32694	-0.38167	0.25265	-0.2634	0.22078	-0.12364	0.52143
OTU2796	0.35122	0.21836	0.3057	0.13101	0.30624	-0.48038	-0.21836
OTU3620	0.17833	-0.07526	0.00538	-0.15052	0.16693	-0.15589	-0.05376
OTU3506	-0.0878	-0.04367	0.48038	-0.39304	-0.48123	0.04367	-0.04367
OTU2351	-0.27831	-0.00538	0.35479	-0.63969	-0.53311	0.12364	-0.12364
OTU3221	-0.25189	-0.56471	0.11593	-0.02618	0.3634	-0.04862	0.51983
OTU1769	0.74275	0.16112	0.12429	0.24858	0.47959	-0.75955	-0.05984
OTU3025	-0.14579	-0.15227	-0.1559	-0.13777	-0.0345	0.13415	0.21391
OTU952	0.29522	0.41331	-0.13415	-0.12327	-0.1598	-0.06889	-0.36981
OTU2771	-0.00461	-0.07343	0.3488	-0.47731	-0.28505	-0.04589	-0.09179
OTU716	-0.25669	-0.52143	0.043	-0.12364	0.4658	-0.2634	0.59131
OTU3811	0.0323	-0.32126	0.31208	-0.1744	-0.01379	-0.27537	0.24783
OTU932	0.0878	0.3057	-0.48038	0.48038	0.17499	0.3057	-0.39304
OTU2749	-0.01571	-0.2579	0.40638	-0.37512	-0.37969	0.14849	-0.07815
OTU466	0.5513	0.61353	-0.46225	0.60093	0.28836	0.01261	-0.58412
OTU301	-0.50751	-0.55992	0.16522	-0.26619	0.29884	-0.22947	0.73432
OTU1325	0.17071	0.73432	-0.73432	0.73432	-0.08276	0.75267	-0.76185
OTU2384	-0.38897	-0.17058	0.12481	-0.37444	-0.47929	0.50342	-0.0416
OTU1774	0.51878	0.2634	0.09676	0.13439	0.27463	-0.65044	-0.08601
OTU2386	-0.21951	-0.48038	0.39304	-0.3057	-0.39373	0.21836	0.21836
OTU2580	-0.42309	-0.2124	0.1416	-0.354	-0.43343	0.2832	-0.0236
OTU3123	0.00784	0.05459	-0.03119	-0.02339	-0.03125	0.09358	-0.19495
OTU3921	0.77292	0.72034	-0.41429	0.77259	0.30846	-0.00373	-0.67555
OTU2311	-0.14133	-0.34881	0.0178	-0.0961	0.19254	-0.20288	0.47338
OTU3880	0.14662	0.53853	-0.30666	0.44877	-0.29596	0.57219	-0.54975
OTU3052	-0.65455	-0.36612	0.5367	-0.78217	-0.67518	0.1581	0.27875
OTU889	0.48444	0.3488	-0.48648	0.65171	0.35401	0.28455	-0.51402
OTU1802	-0.04323	0.34406	-0.16455	0.05236	-0.17046	0.3665	-0.51235
OTU2876	0.26977	-0.20386	0.40356	-0.11649	-0.24173	0.12897	-0.08737
OTU1771	0.35122	0.21836	0.3057	0.13101	0.30624	-0.48038	-0.21836
OTU3977	-0.48292	-0.21836	0.13101	-0.21836	-0.13124	-0.04367	0.39304
OTU1076	-0.21951	-0.48038	0.39304	-0.3057	-0.39373	0.21836	0.21836
OTU223	-0.61824	-0.39469	0.33044	-0.43141	-0.30803	-0.11933	0.51402
OTU2353	-0.0878	-0.04367	0.48038	-0.39304	-0.48123	0.04367	-0.04367
OTU3814	0.07836	0.23115	0.17739	-0.10751	-0.41464	0.36016	-0.36016
OTU1633	-0.0392	0.17156	-0.36651	0.21834	0.14061	0.25733	-0.24174
OTU1952	-0.65388	-0.4408	0.01613	-0.20427	0.01346	-0.18277	0.63969
OTU1721	0.61482	0.12897	0.08737	0.05409	0.4001	-0.66567	-0.09153
OTU3961	0.16752	0.11289	0.59131	-0.22577	-0.1777	-0.29028	-0.18277
OTU2146	-0.0878	-0.04367	0.48038	-0.39304	-0.48123	0.04367	-0.04367
OTU3590	0.02256	0.08602	0.05236	0.04114	0.17982	-0.11967	-0.22439
OTU2953	-0.59444	-0.14514	0.07526	-0.49993	-0.25309	0.05376	0.22577
OTU3862	-0.0878	-0.04367	0.48038	-0.39304	-0.48123	0.04367	-0.04367
OTU2036	-0.37371	-0.25701	0.53238	-0.75267	-0.69882	0.22947	0
OTU1625	0.29007	0.29978	-0.00375	-0.01124	0.02065	-0.12741	-0.42719
OTU63	-0.44334	-0.43685	0.29123	-0.52006	-0.26674	0.03328	0.33284
OTU1351	-0.55836	-0.41605	0.41605	-0.76552	-0.58557	0.14146	0.1997
OTU2588	-0.06663	-0.32752	0.46788	-0.21055	0.0664	-0.49907	0.33531
OTU2391	-0.21951	-0.48038	0.39304	-0.3057	-0.39373	0.21836	0.21836
OTU3928	-0.0878	-0.04367	0.48038	-0.39304	-0.48123	0.04367	-0.04367
OTU3073	-0.0878	-0.04367	0.48038	-0.39304	-0.48123	0.04367	-0.04367
OTU3946	-0.37445	-0.38001	0.49288	-0.52298	-0.54462	0.19941	0.14297
OTU966	0.15687	0.72514	-0.75267	0.75267	-0.05977	0.73432	-0.75267
OTU2948	-0.21951	-0.48038	0.39304	-0.3057	-0.39373	0.21836	0.21836
OTU2555	-0.48427	0.03754	0.06673	-0.41291	-0.54315	0.19603	-0.0292
OTU2401	-0.44334	-0.43685	0.29123	-0.52006	-0.26674	0.03328	0.33284
OTU1360	-0.30533	0.00538	0.29028	-0.65044	-0.5008	0.13439	-0.13439
OTU2350	-0.0878	-0.04367	0.48038	-0.39304	-0.48123	0.04367	-0.04367
OTU2389	-0.21886	-0.36016	0.65044	-0.52143	-0.65158	0.18277	0.11289
OTU2604	-0.19916	-0.49632	0.6715	-0.4713	-0.46377	0	0.31281
OTU996	-0.55139	-0.5104	-0.01143	-0.17521	-0.03243	-0.15236	0.7656
OTU3232	0.0878	0.3057	-0.48038	0.48038	0.17499	0.3057	-0.39304
OTU1447	-0.0878	-0.04367	0.48038	-0.39304	-0.48123	0.04367	-0.04367
OTU3675	0.13841	-0.10097	0.31208	-0.33962	-0.12873	-0.12851	-0.06425
OTU2861	-0.0878	-0.04367	0.48038	-0.39304	-0.48123	0.04367	-0.04367
OTU2127	-0.27831	-0.00538	0.35479	-0.63969	-0.53311	0.12364	-0.12364
